# Supplementary material for: Genome-wide identification of circular RNAs to elucidate the genetic basis of disease resistance to Salmonella infection in Chicken
Source: Research Square preprint supplement (doi:10.21203/rs.3.rs-5757781/v1), 2025-01-08
Supplement: Supplementary file 1 [file 629738f81760cf7815d0e5f5.xlsx]

## Sheet: G1
chrom	circRNA_start	circRNA_end	strand	exonCount	exonSizes	exonOffsets	circType	Type	geneName	isoformName	exonIndexOrIntronIndex	BSJsInBoilerLiverInfected	BSJsInBoilerLiverControl	pValue
4	19781136	19781167	+	1	31,	0,	ciRNA	Intronic	FGB	ENSGALT00010035943	8	1,1,2	2,0	0.000427587
13	10161940	10164094	+	4	134,61,137,61,	0,563,1495,2093,	circRNA	Exonic	SPINK5	ENSGALT00010035290	4,5,6,7	0,0,3	0,2	0.00501591
31	244605	245598	-	2	330,330,	0,663,	circRNA	Exonic	PIT54	ENSGALT00010011735	3,4	2,12,36	5,8	0.0119686
4	19779516	19781139	+	3	121,286,154,	0,291,1469,	circRNA	Exonic	FGB	ENSGALT00010035943	6,7,8	0,0,1	0,1	0.0436588
13	2916683	2916779	-	1	96,	0,	circRNA	Exonic	NPM1	ENSGALT00010024922	7	0,2,0	1,0	0.0437959
13	10161618	10162074	+	2	61,134,	0,322,	circRNA	Exonic	SPINK5	ENSGALT00010035290	3,4	0,0,2	1,0	0.0462246
4	50349481	50349691	+	1	210,	0,	circRNA	Exonic	ALB	ENSGALT00010011946	8	1,0,0	0,1	0.0493031

## Sheet: G2
chrom	circRNA_start	circRNA_end	strand	exonCount	exonSizes	exonOffsets	circType	Type	geneName	isoformName	exonIndexOrIntronIndex	BSJsInBoilerSpleenInfected	BSJsInBoilerSpleenControl	pValue
27	5097720	5097816	+	1	96,	0,	ciRNA	Intronic	RPL27	ENSGALT00010054516	1	4,4,8	10,0	0.0245521
15	6400622	6400826	-	1	204,	0,	circRNA	Exonic	RPL6	ENSGALT00010049978	6	0,0,2	1,0	0.0444302

## Sheet: G3
chrom	circRNA_start	circRNA_end	strand	exonCount	exonSizes	exonOffsets	circType	Type	geneName	isoformName	exonIndexOrIntronIndex	BSJsInBoilerLiverInfected	BSJsInFavrollaLiverInfected	pValue
31	244605	245598	-	2	330,330,	0,663,	circRNA	Exonic	PIT54	ENSGALT00010011735	3,4	2,12,36	2,1,2	6.91196e-06
4	19800481	19801886	-	3	278,185,134,	0,918,1271,	circRNA	Exonic	FGG	ENSGALT00010035977	3,4,5	0,0,1	0,2,0	0.00293916
4	19779514	19779921	+	2	123,114,	0,293,	circRNA	Exonic	FGB	ENSGALT00010035939	6,7	0,1,3	3,0,0	0.00497542
4	19800481	19801585	-	2	278,186,	0,918,	circRNA	Exonic	FGG	ENSGALT00010035977	3,4	12,3,24	1,1,1	0.00932564
4	19781136	19781272	+	1	136,	0,	ciRNA	Intronic	FGB	ENSGALT00010035943	8	1,0,2	0,2,0	0.0194398
6	16025264	16029254	-	2	109,173,	0,3817,	circRNA	Exonic	ADK	ENSGALT00010054510	6,7	0,1,1	2,0,0	0.0243576
4	19781136	19781167	+	1	31,	0,	ciRNA	Intronic	FGB	ENSGALT00010035943	8	1,1,2	0,1,2	0.0264073
13	10164039	10165289	+	3	55,137,51,	0,719,1199,	circRNA	Exonic	SPINK5	ENSGALT00010035290	7,8,9	0,1,0	2,0,0	0.0269289
4	59499915	59500044	-	1	129,	0,	circRNA	Exonic	ADH1C	ENSGALT00010014446	2	0,0,1	0,0,1	0.0399786
4	19780984	19781144	+	1	160,	0,	circRNA	Exonic	FGB	ENSGALT00010035943	8	1,1,2	2,0,1	0.0466253

## Sheet: G4
chrom	circRNA_start	circRNA_end	strand	exonCount	exonSizes	exonOffsets	circType	Type	geneName	isoformName	exonIndexOrIntronIndex	BSJsInBroilerSpleenInfected	BSJsInFaverollaSpleenInfected	pValue
26	2706872	2715091	+	19	100,86,195,183,192,100,86,195,183,183,183,180,192,100,92,195,180,183,192,	0,387,902,1531,1800,2159,2436,3057,3371,4295,4679,5005,5572,5944,6234,6526,7252,7751,8027,	circRNA	Exonic	CR1	ENSGALT00010065861	11,12,13,14,15,16,17,18,19,20,21,22,23,24,25,26,27,28,29	4,9,3	9,12	0.00132321
1	133477087	133477203	+	1	116,	0,	circRNA	Exonic	RPL31	ENSGALT00010032425	2	1,1,3	0,2	0.0967287

## Sheet: G5
chrom	circRNA_start	circRNA_end	strand	exonCount	exonSizes	exonOffsets	circType	Type	geneName	isoformName	exonIndexOrIntronIndex	BSJsInFaverollaLiverInfected	BSJsInFaverollaLiverControl	pValue
4	19781130	19781271	+	1	141,	0,	ciRNA	Intronic	FGB	ENSGALT00010035943	8	0,0,1	0,3	0.00164177
4	19800481	19801585	-	2	278,186,	0,918,	circRNA	Exonic	FGG	ENSGALT00010035977	3,4	1,1,1	0,2	0.039652
6	16025264	16029254	-	2	109,173,	0,3817,	circRNA	Exonic	ADK	ENSGALT00010054510	6,7	2,0,0	3,1	0.0499985
13	10164758	10166642	+	4	137,61,134,61,	0,480,1608,1823,	circRNA	Exonic	SPINK5	ENSGALT00010035290	8,9,10,11	0,0,2	1,0	0.0742902

## Sheet: G6
chrom	circRNA_start	circRNA_end	strand	exonCount	exonSizes	exonOffsets	circType	Type	geneName	isoformName	exonIndexOrIntronIndex	BSJsInFaverollaSpleenInfected	BSJsInFaverollaSpleenControl	pValue
26	2706872	2715091	+	19	100,86,195,183,192,100,86,195,183,183,183,180,192,100,92,195,180,183,192,	0,387,902,1531,1800,2159,2436,3057,3371,4295,4679,5005,5572,5944,6234,6526,7252,7751,8027,	circRNA	Exonic	CR1	ENSGALT00010065861	11,12,13,14,15,16,17,18,19,20,21,22,23,24,25,26,27,28,29	9,12	7,3	0.000827222

## Sheet: Key_terms
#Term	Database	Input number	P-Value	Corrected P-Value	Input
Disease	Reactome	7	3.00184e-09	1.02063e-06	RPL6|RPL27|ALB|RPL31|FGG|NPM1|FGB
Complement and coagulation cascades	KEGG PATHWAY	3	1.4321e-06	5.76201e-05	FGG|CR1|FGB
Infectious disease	Reactome	4	2.59229e-06	5.76201e-05	RPL6|RPL27|NPM1|RPL31
Selenoamino acid metabolism	Reactome	3	4.51513e-06	5.76201e-05	RPL6|RPL27|RPL31
Platelet degranulation	Reactome	3	5.87669e-06	6.24399e-05	FGG|ALB|FGB
Metabolism of proteins	Reactome	6	6.76628e-06	6.57295e-05	RPL6|RPL27|ALB|RPL31|FGG|NPM1
Signaling by ROBO receptors	Reactome	3	2.73424e-05	0.000149942	RPL6|RPL27|RPL31
Platelet activation, signaling and aggregation	Reactome	3	4.71461e-05	0.000239249	FGG|ALB|FGB
MAP2K and MAPK activation	Reactome	2	6.10888e-05	0.000284523	FGG|FGB
Metabolism of amino acids and derivatives	Reactome	3	0.000129568	0.000524442	RPL6|RPL27|RPL31
Integrin cell surface interactions	Reactome	2	0.000257587	0.000973108	FGG|FGB
Platelet activation	KEGG PATHWAY	2	0.00055161	0.00195362	FGG|FGB
Regulation of Insulin-like Growth Factor (IGF) transport and uptake by Insulin-like Growth Factor Binding Proteins (IGFBPs)	Reactome	2	0.00056035	0.00196411	FGG|ALB
Toll-like Receptor Cascades	Reactome	2	0.000842978	0.00280993	FGG|FGB
MAPK1/MAPK3 signaling	Reactome	2	0.00199042	0.00563953	FGG|FGB
FLT3 Signaling	Reactome	2	0.00220703	0.00614126	FGG|FGB
Innate Immune System	Reactome	3	0.00265201	0.00683092	FGG|CR1|FGB
TP53 Regulates Transcription of Cell Cycle Genes	Reactome	1	0.0136471	0.0218868	NPM1
Immune System	Reactome	3	0.018225	0.02754	FGG|CR1|FGB
Drug metabolism - cytochrome P450	KEGG PATHWAY	1	0.0202694	0.0295777	ADH1C

## Sheet: GO
Source	Description	GO_ID	FDR Corrected P-Value	Gene Involved	intersections
GO:MF	structural molecule activity	GO:0005198	0.00150127	5	FGB,FGG,RPL31,RPL27,RPL6
GO:MF	structural constituent of ribosome	GO:0003735	0.0443243	3	RPL31,RPL27,RPL6
GO:BP	positive regulation of heterotypic cell-cell adhesion	GO:0034116	0.0134854	2	FGB,FGG
GO:BP	fibrinolysis	GO:0042730	0.0179733	2	FGB,FGG
GO:BP	blood coagulation, fibrin clot formation	GO:0072378	0.0179733	2	FGB,FGG
GO:BP	protein activation cascade	GO:0072376	0.0288621	2	FGB,FGG
GO:BP	positive regulation of vasoconstriction	GO:0045907	0.0352615	2	FGB,FGG
GO:BP	regulation of heterotypic cell-cell adhesion	GO:0034114	0.0422966	2	FGB,FGG
GO:CC	cytosolic large ribosomal subunit	GO:0022625	0.000166225	3	RPL31,RPL27,RPL6
GO:CC	fibrinogen complex	GO:0005577	0.000469819	2	FGB,FGG
GO:CC	cytosolic ribosome	GO:0022626	0.00089463	3	RPL31,RPL27,RPL6
GO:CC	large ribosomal subunit	GO:0015934	0.00163328	3	RPL31,RPL27,RPL6
GO:CC	platelet alpha granule	GO:0031091	0.00210998	2	FGB,FGG
GO:CC	ribosomal subunit	GO:0044391	0.00536472	3	RPL31,RPL27,RPL6
GO:CC	ribosome	GO:0005840	0.0303989	3	RPL31,RPL27,RPL6
